# Supplementary material for: Trends in multimorbidity, complex multimorbidity and multiple functional limitations in the ageing population of England, 2002–2015
Source: PubMed Central journal article supplement (PMC6727093; doi:10.1177/2235042x19872030), 2019-09-04
Supplement: Supplementary_material_v2.pdf [file Supplementary_material_v2.pdf]

Supplementary material A.

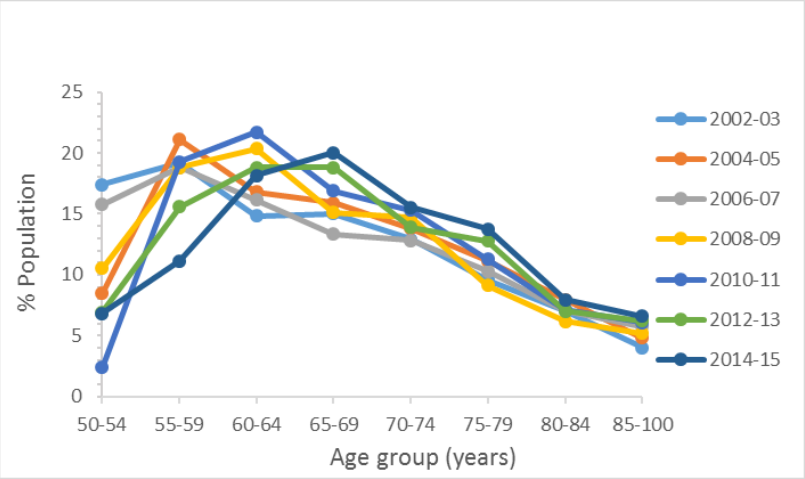

**Table A.1** Age structure 2002-2015

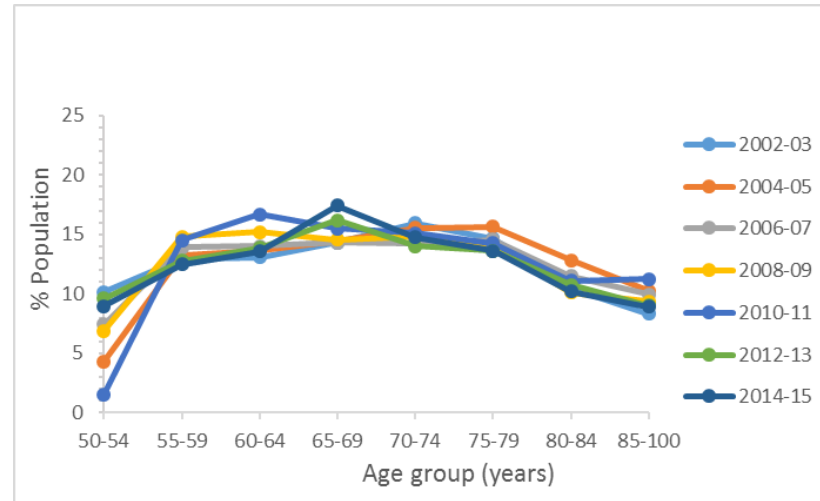

**Table A.2** Distribution of multimorbidity by age group and time

## Supplementary material B.

**Table B.1** Prevalence of MM by age

| Age (years)      | 2002/03 |                      | 2004/05 |                                    | 2006/07 |                      | 2008/09 |                      | 2010/11 |                      | 2012/13 |                      | 2014/15 |                      |
|------------------|---------|----------------------|---------|------------------------------------|---------|----------------------|---------|----------------------|---------|----------------------|---------|----------------------|---------|----------------------|
|                  | n*      | Prevalence (95 % CI) | n*      | Prevalence (95 % CI)               | n*      | Prevalence (95 % CI) | n*      | Prevalence (95 % CI) | n*      | Prevalence (95 % CI) | n*      | Prevalence (95 % CI) | n*      | Prevalence (95 % CI) |
| 50-54            | 481     | 21.8 (19.9-23.8)     | 158     | 18.8 (16.1-21.7)                   | 279     | 22.5 (20.3-24.9)     | 303     | 23.3 (20.7-26)       | 69      | 24.7 (19.4-30.9)     | 422     | 26.3 (22.8-30.1)     | 375     | 23.6 (20.1-27.5)     |
| 55-59            | 616     | 30.3 (28.3-32.4)     | 485     | 25.8 (23.7-28)                     | 523     | 28.9 (26.7-31.2)     | 652     | 29.3 (27.1-31.5)     | 645     | 30.3 (28.1-32.7)     | 563     | 35 (32.1-37.9)       | 521     | 38.3 (34.8-41.8)     |
| 60-64            | 619     | 36.8 (34.3-39.3)     | 501     | 35.5 (33-38)                       | 528     | 36.5 (33.9-39.2)     | 668     | 38.5 (36.3-40.8)     | 743     | 40.7 (38.4-43)       | 611     | 40.3 (37.9-42.8)     | 568     | 45.6 (43-48.3)       |
| 65-69            | 678     | 43.8 (41.5-46.2)     | 530     | 40.3 (37.7-42.9)                   | 538     | 45.4 (42.5-48.4)     | 640     | 49.2 (46.6-51.8)     | 689     | 49.3 (46.6-51.9)     | 713     | 51.8 (49.3-54.3)     | 729     | 57.3 (54.9-59.8)     |
| 70-74            | 755     | 54 (51.4-56.7)       | 570     | 50.9 (48.1-53.8)                   | 534     | 52.9 (49.8-55.9)     | 652     | 57.8 (55.1-60.4)     | 671     | 57.3 (54.5-60)       | 617     | 61.3 (58.5-64)       | 616     | 66.2 (63.4-68.9)     |
| 75-79            | 696     | 59.8 (56.8-62.7)     | 574     | 58.3 (55.2-61.4)                   | 548     | 64.6 (61.3-67.8)     | 623     | 67.4 (64.1-70.5)     | 634     | 67.7 (64.7-70.6)     | 600     | 72.4 (69.6-75)       | 570     | 75.8 (73.1-78.4)     |
| 80-84            | 496     | 64.3 (60.8-67.6)     | 471     | 65 (61.3-68.5)                     | 433     | 69.6 (65.7-73.3)     | 445     | 70.7 (66.6-74.5)     | 493     | 77.3 (73.6-80.5)     | 474     | 78 (74.5-81.1)       | 426     | 79.2 (75.6-82.3)     |
| 85-100           | 396     | 68.9 (64.2-73.1)     | 376     | 74.7 (70-78.9)<br>41.7 (40.6-42.9) | 375     | 75.3 (70.5-79.6)     | 412     | 74.1 (69.6-78.1)     | 501     | 82.8 (79-86.1)       | 397     | 77.7 (73.6-81.3)     | 372     | 80.2 (76.1-83.7)     |
| Total            | 4,739   | 41.6 (40.6-42.6)     | 3,664   | 42.9                               | 3,759   | 43.4 (42.3-44.5)     | 4,396   | 44.8 (43.8-45.9)     | 4,446   | 49.5 (48.4-50.6)     | 4,398   | 48.5 (47.3-49.8)     | 4,178   | 51.2 (49.9-52.6)     |
| Mean age (SD)    |         | 68.9 (10.5)          |         | 70.7 (10.3)                        |         | 70.1 (11.1)          |         | 69.8 (10.3)          |         | 70.8 (9.5)           |         | 70.8 (9.6)           |         | 71.4 (9.2)           |
| Median age (IQR) |         | 69 (60-77)           |         | 71 (62-78)                         |         | 70 (61-78)           |         | 69 (62-77)           |         | 70 (63-78)           |         | 71 (64-78)           |         | 71 (65-78)           |

\* Number of persons with MM

**Table B.2** Prevalence of CMM by age

| Age (years)      | 2002/03 |                      | 2004/05 |                      | 2006/07 |                      | 2008/09 |                      | 2010/11 |                      | 2012/13 |                      | 2014/15 |                      |
|------------------|---------|----------------------|---------|----------------------|---------|----------------------|---------|----------------------|---------|----------------------|---------|----------------------|---------|----------------------|
|                  | n *     | Prevalence (95 % CI) | n *     | Prevalence (95 % CI) | n *     | Prevalence (95 % CI) | n *     | Prevalence (95 % CI) | n *     | Prevalence (95 % CI) | n *     | Prevalence (95 % CI) | n *     | Prevalence (95 % CI) |
| 50-54            | 90      | 4.1 (3.3-5.1)        | 32      | 3.8 (2.6-5.5)        | 77      | 6.2 (5-7.6)          | 77      | 5.9 (4.6-7.5)        | 25      | 8.9 (5.8-13.3)       | 131     | 8.2 (6.2-10.8)       | 113     | 7.1 (5.2-9.6)        |
| 55-59            | 122     | 6 (5.1-7)            | 109     | 5.7 (4.8-6.9)        | 144     | 8 (6.7-9.5)          | 196     | 8.8 (7.5-10.2)       | 180     | 8.5 (7.2-9.9)        | 230     | 14.3 (12.3-16.5)     | 163     | 12 (9.7-14.6)        |
| 60-64            | 142     | 8.4 (7.2-9.9)        | 140     | 9.9 (8.4-11.6)       | 164     | 11.4 (9.8-13.2)      | 240     | 13.8 (12.3-15.5)     | 261     | 14.3 (12.7-16)       | 260     | 17.2 (15.4-19.2)     | 200     | 16.1 (14.2-18.1)     |
| 65-69            | 168     | 10.8 (9.4-12.4)      | 182     | 13.9 (12.1-15.8)     | 158     | 13.4 (11.5-15.5)     | 240     | 18.4 (16.4-20.6)     | 287     | 20.6 (18.5-22.8)     | 325     | 23.6 (21.6-25.8)     | 293     | 24 (20.9-25.4)       |
| 70-74            | 233     | 16.7 (14.8-18.7)     | 208     | 18.5 (16.4-20.9)     | 184     | 18.2 (15.9-20.8)     | 265     | 23.5 (21.3-25.9)     | 298     | 25.4 (23-28)         | 302     | 30 (27.4-32.7)       | 282     | 30.3 (27.7-33.1)     |
| 75-79            | 245     | 21 (18.7-23.6)       | 224     | 22.8 (20.2-25.6)     | 195     | 23 (20.3-25.9)       | 288     | 31.1 (27.9-35.7)     | 309     | 33 (30-36.1)         | 325     | 39.2 (36.3-42.2)     | 266     | 35.5 (32.6-38.5)     |
| 80-84            | 223     | 28.9 (25.9-32)       | 210     | 29 (25.7-32.6)       | 176     | 28.3 (24.7-32.1)     | 199     | 31.6 (28.1-34.3)     | 255     | 40 (36-44)           | 275     | 45.2 (41.2-49.2)     | 236     | 43.8 (39.8-47.9)     |
| 85-100           | 178     | 31 (26.6-35.7)       | 168     | 33.4 (28.8-38.4)     | 151     | 30.4 (26.3-34.9)     | 194     | 34.9 (30.5-39.5)     | 250     | 41.3 (36.9-45.7)     | 214     | 41.9 (37.4-46.5)     | 203     | 43.6 (39.1-48.3)     |
| Total            | 1400    | 12.3 (11.7-12.9)     | 1,272   | 14.5 (13.7-15.3)     | 1,250   | 14.4 (13.7-15.2)     | 1,698   | 17.3 (16.5-18.1)     | 1,865   | 20.8 (19.9-21.7)     | 2,062   | 22.8 (21.8-23.7)     | 1,756   | 21.5 (20.5-22.6)     |
| Mean age (SD)    |         | 71.9 (10.6)          |         | 73 (9.9)             |         | 71.6 (11.2)          |         | 71.5 (10.2)          |         | 72.5 (9.4)           |         | 72 (9.5)             |         | 73 (9.1)             |
| Median age (IQR) |         | 72 (64-80)           |         | 74 (66-81)           |         | 72 (63-80)           |         | 71 (63-80)           |         | 73 (65-80)           |         | 72 (65-79)           |         | 73 (66-80)           |

\* Number of persons with CMM

**Table B.3** Prevalence of 10+MFLs by age

|                  |      | 2002/03              |       | 2004/05              |       | 2006/07              |      | 2008/09              |       | 2010/11              |       | 2012/13              |       | 2014/15              |  |
|------------------|------|----------------------|-------|----------------------|-------|----------------------|------|----------------------|-------|----------------------|-------|----------------------|-------|----------------------|--|
| Age (years)      | n*   | Prevalence (95 % CI) | n*    | Prevalence (95 % CI) | n*    | Prevalence (95 % CI) | n*   | Prevalence (95 % CI) | n*    | Prevalence (95 % CI) | n*    | Prevalence (95 % CI) | n*    | Prevalence (95 % CI) |  |
| 50-54            | 104  | 4.7 (3.9-5.7)        | 55    | 6.6 (4.9-8.7)        | 83    | 6.7 (5.5-8.2)        | 128  | 9.8 (8.1-11.9)       | 30    | 10.8 (7.3-15.6)      | 157   | 9.8 (7.5-12.6)       | 110   | 6.9 (5.1-9.3)        |  |
| 55-59            | 149  | 7.3 (6.3-8.5)        | 150   | 7.9 (6.8-9.3)        | 157   | 9.2 (7.8-10.8)       | 200  | 10.2 (8.8-11.7)      | 189   | 8.9 (7.5-10.5)       | 213   | 13.2 (11.3-15.4)     | 138   | 10.1 (8.1-12.5)      |  |
| 60-64            | 136  | 8.1 (6.8-9.5)        | 153   | 10.9 (9.4-12.6)      | 165   | 11.4 (9.8-13.3)      | 228  | 11.5 (10.1-13.2)     | 160   | 8.8 (7.5-10.2)       | 174   | 11.5 (10-13.2)       | 129   | 10.4 (8.8-12.2)      |  |
| 65-69            | 138  | 8.8 (7.6-10.3)       | 124   | 9.4 (8-11.1)         | 157   | 12.1 (10.3-14.1)     | 179  | 13.8 (12.1-15.7)     | 174   | 12.5 (10.7-14.4)     | 184   | 13.4 (11.7-15.2)     | 141   | 11.1 (9.5-12.9)      |  |
| 70-74            | 145  | 10.3 (8.8-12.1)      | 149   | 13.4 (11.5-15.5)     | 147   | 14.5 (12.5-16.8)     | 175  | 15.5 (13.6-17.6)     | 176   | 15 (13.1-17.2)       | 160   | 15.9 (13.8-18.2)     | 139   | 15 (12.9-17.3)       |  |
| 75-79            | 160  | 13.7 (11.7-16)       | 162   | 16.4 (14.1-19)       | 157   | 18.6 (16-21.4)       | 175  | 20.9 (18.3-23.9)     | 183   | 19.6 (17.2-22.3)     | 153   | 18.5 (16.2-21)       | 158   | 21 (18.5-23.8)       |  |
| 80-84            | 147  | 19 (16.4-21.9)       | 192   | 26.6 (23.3-30.1)     | 162   | 26 (22.4-29.8)       | 193  | 27.9 (24.2-31.9)     | 178   | 28 (24.4-31.8)       | 158   | 26 (22.5-29.9)       | 163   | 30.3 (26.7-34.2)     |  |
| 85-100           | 191  | 33.2 (28.7-37.9)     | 221   | 43.9 (38.8-49)       | 216   | 43.4 (38.6-48.3)     | 218  | 39.1 (34.5-44)       | 254   | 42 (37.6-46.7)       | 206   | 40.2 (35.8-44.8)     | 231   | 49.8 (45-54.6)       |  |
| Total            | 1169 | 10.3 (9.6-10.9)      | 1,207 | 13.7 (12.9-14.6)     | 1,240 | 14.3 (13.5-15.1)     | 1496 | 15.3 (14.5-16.1)     | 1,346 | 15 (14.2-15.8)       | 1,405 | 15.5 (14.7-16.4)     | 1,210 | 14.8 (14-15.7)       |  |
| Mean age (SD)    |      | 70.7 (12)            |       | 72.6 (11.8)          |       | 72.3 (12.6)          |      | 71.2 (12.1)          |       | 73.2 (10.6)          |       | 72 (11)              |       | 74.3 (10.6)          |  |
| Median age (IQR) |      | 70 (61-80)           |       | 73 (62-81)           |       | 72 (62-82)           |      | 70 (61-80)           |       | 73 (64-82)           |       | 72 (63-81)           |       | 75 (66-83)           |  |

\* Number of persons with 10+ functional limitations

**Table B.4** Household wealth bands in £s by year

| Household wealth (£s i | 2002/03      |             | 2004/05      |             | 2006/07      |             | 2008/09      |             | 2010/11       |             | 2012/13      |             | 2014/15       |             |
|------------------------|--------------|-------------|--------------|-------------|--------------|-------------|--------------|-------------|---------------|-------------|--------------|-------------|---------------|-------------|
|                        | Lower bound  | Upper bound | Lower bound  | Upper bound | Lower bound  | Upper bound | Lower bound  | Upper bound | Lower bound   | Upper bound | Lower bound  | Upper bound | Lower bound   | Upper bound |
| Quintile 1             | -108,000     | 0           | -130         | 27,5        | -160         | 37,5        | -450         | 56          | -80           | 65          | -20          | 65          | -220          | 70          |
| Quintile 2             | 3,000        | 75          | 29,5         | 129         | 37,5         | 150         | 56,5         | 150         | 66            | 150         | 66           | 150         | 71,1          | 160         |
| Quintile 3             | 75,250       | 125         | 129,3        | 185         | 151          | 200         | 150,5        | 200         | 150,5         | 208         | 151          | 210         | 161           | 240         |
| Quintile 4             | 126,000      | 200         | 185,4        | 265         | 201          | 300         | 200,2        | 300         | 208,7         | 300         | 211          | 320         | 241           | 350         |
| Quintile 5             | 200,500      | 2,486       | 266,7        | 2,000       | 301          | 4,440       | 301          | 3,500       | 304           | 4,000       | 321          | 4,500       | 351           | 4,000       |
| Median (IQR*)          | 100 (33-180) |             | 155 (75-245) |             | 175 (89-261) |             | 175 (91-265) |             | 180 (100-285) |             | 180 (95-290) |             | 190 (100-310) |             |

\* Interquartile range

Supplementary material C.

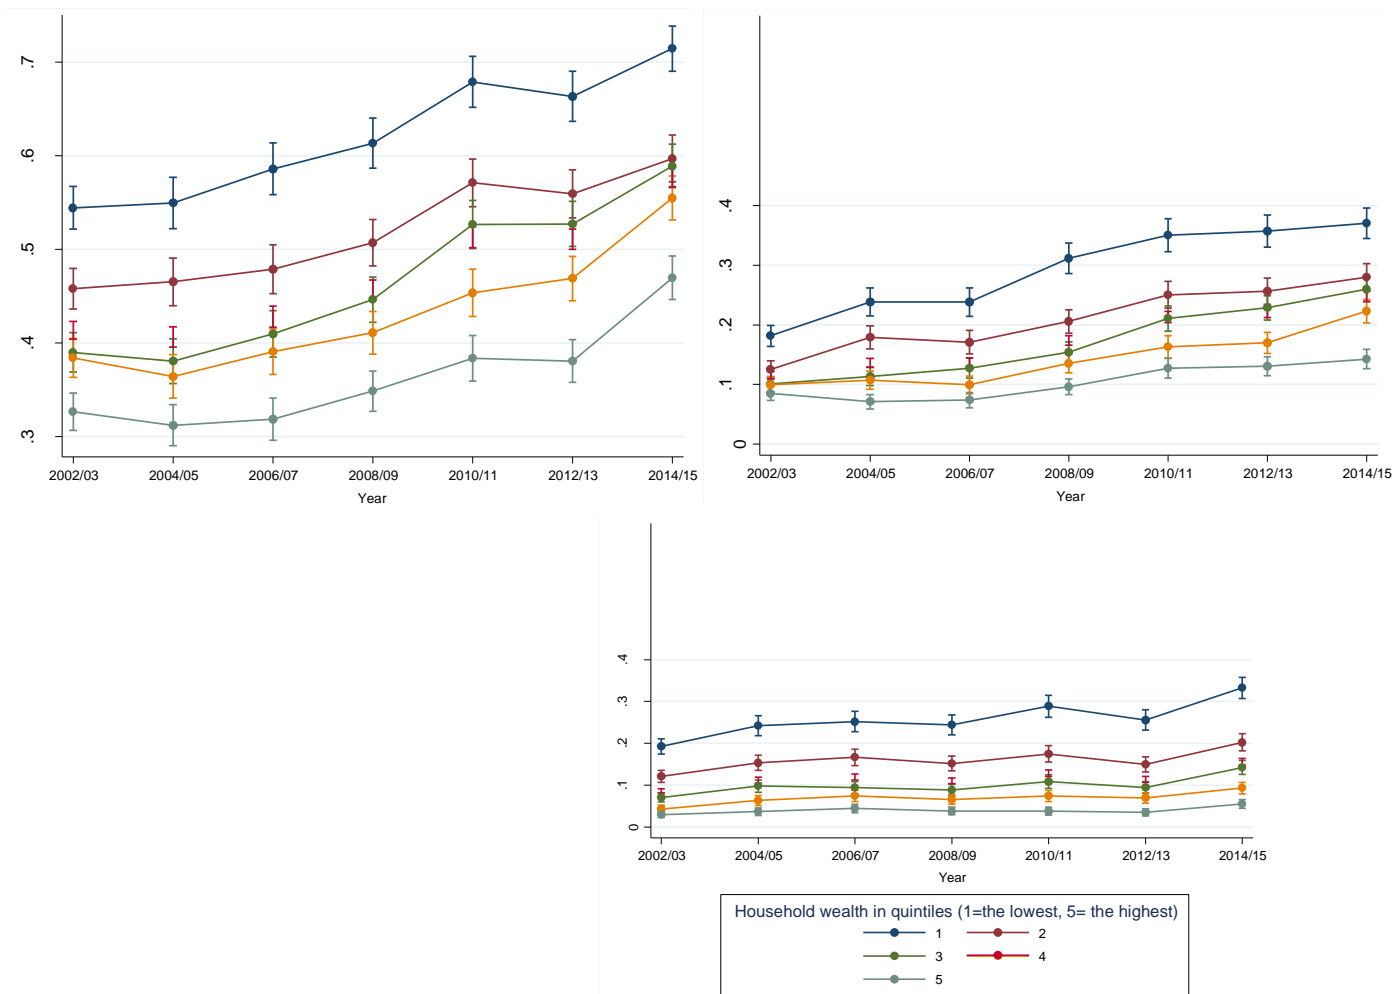

**Figure 5.** Marginal interaction effects of time and wealth on the probability of multimorbidity, complex multimorbidity and multiple functional limitations (95% CIs) in the period 2002-2015.

Supplementary material D.

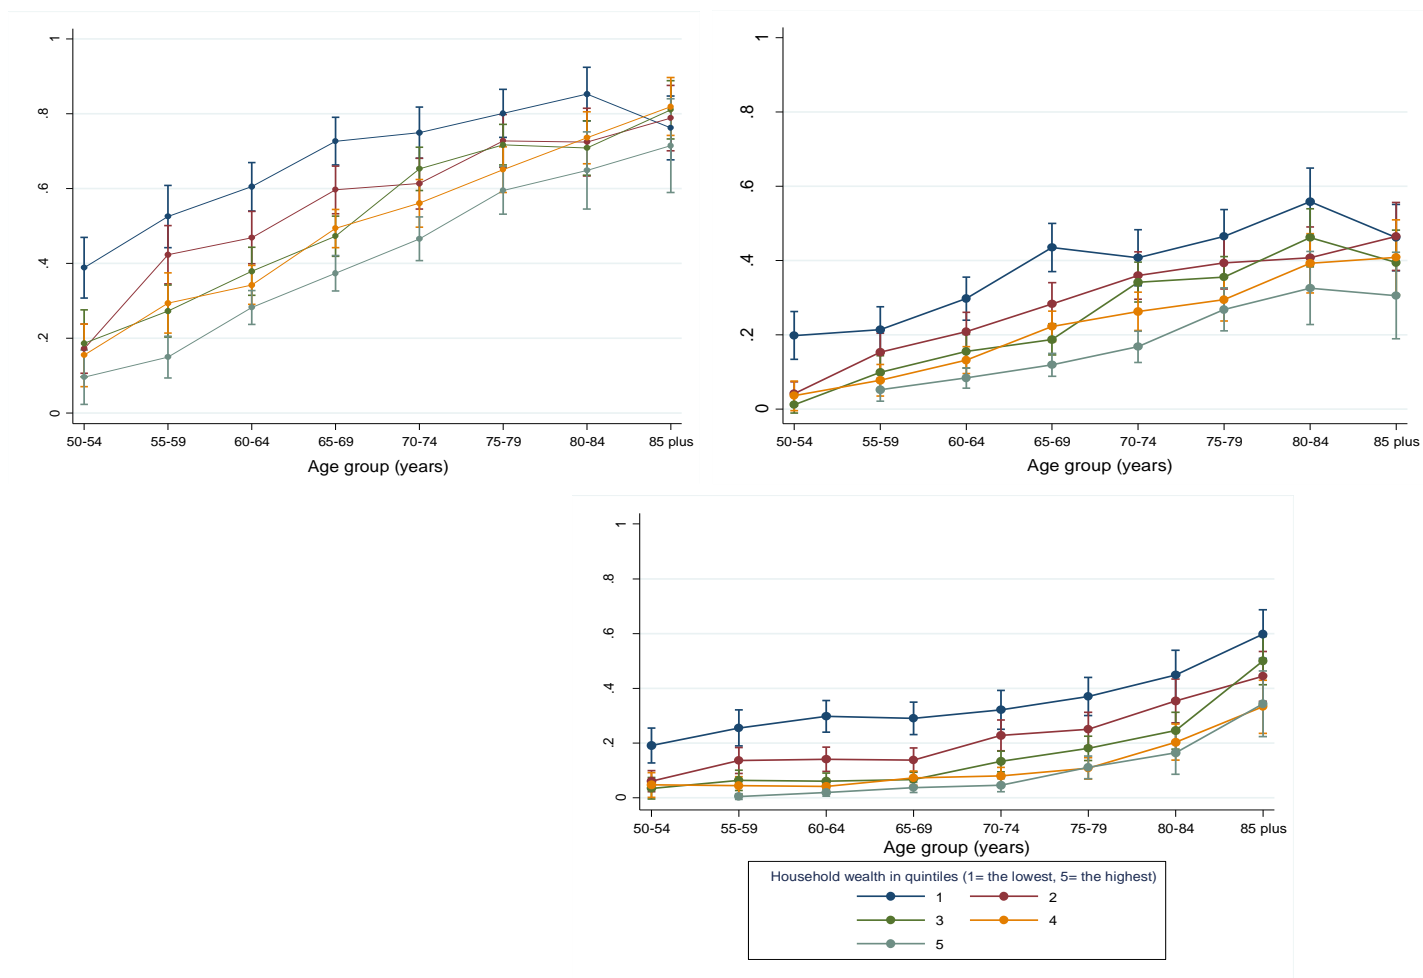

**Figure 6.** Marginal interaction effects of age and wealth on the probability of multimorbidity, complex multimorbidity and multiple functional limitations (95% CIs) in 2014/15.

Supplementary material E.

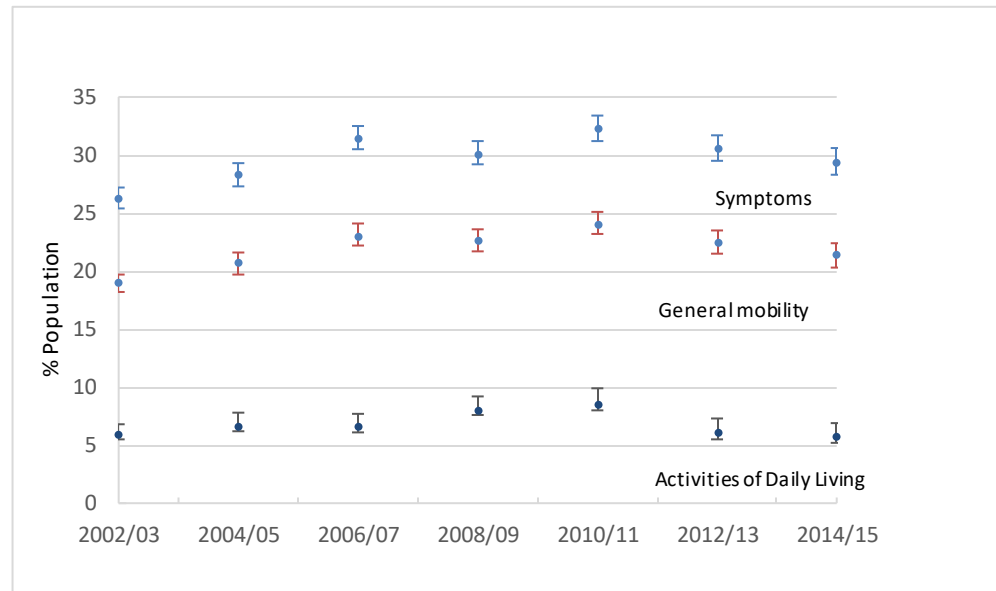

**Figure 7.** Prevalence of functional limitations in Activities of Daily Living, general mobility and symptoms for England in 2002-15 (95% CIs).
